# Supplementary material for: Exploring the impact of calcination parameters on the crystal structure, morphology, and optical properties of electrospun Fe2TiO5 nanofibers
Source: Royal Society of Chemistry journal article supplement (doi:10.1039/d1ra05748k), 2021-01-01
Supplement: d1ra05748k7.pdf [file d1ra05748k7.pdf]

**Table S1** Atomic parameters of calcined PSB NFs obtained by Rietveld refinement

| <b>500 °C_6 h</b> |             |                |                   |                   |                  |                        |
|-------------------|-------------|----------------|-------------------|-------------------|------------------|------------------------|
| <b>Atom</b>       | <b>site</b> | <b>x</b>       | <b>Y</b>          | <b>Z</b>          | <b>Occupancy</b> | <b>U<sub>iso</sub></b> |
| <b>Fe1</b>        | <b>8f</b>   | <b>0.00000</b> | <b>0.1379(15)</b> | <b>0.5683(14)</b> | <b>0.6</b>       | <b>0.007(5)</b>        |
| <b>Ti1</b>        | <b>8f</b>   | <b>0.00000</b> | <b>0.1379</b>     | <b>0.5683</b>     | <b>0.4</b>       | <b>0.007</b>           |
| <b>Fe2</b>        | <b>4c</b>   | <b>0.00000</b> | <b>0.1823(14)</b> | <b>0.25000</b>    | <b>0.8</b>       | <b>0.005(10)</b>       |
| <b>Ti2</b>        | <b>4c</b>   | <b>0.00000</b> | <b>0.1823</b>     | <b>0.25000</b>    | <b>0.2</b>       | <b>0.005</b>           |
| <b>O1</b>         | <b>4c</b>   | <b>0.00000</b> | <b>0.762(6)</b>   | <b>0.25000</b>    | <b>1.000</b>     | <b>0.06(23)</b>        |
| <b>O2</b>         | <b>8f</b>   | <b>0.00000</b> | <b>0.035(5)</b>   | <b>0.098(4)</b>   | <b>1.000</b>     | <b>0.056(20)</b>       |
| <b>O3</b>         | <b>8f</b>   | <b>0.00000</b> | <b>0.304(4)</b>   | <b>0.077(4)</b>   | <b>1.000</b>     | <b>0.027(16)</b>       |
| <b>550 °C_4 h</b> |             |                |                   |                   |                  |                        |
| <b>Atom</b>       | <b>site</b> | <b>x</b>       | <b>Y</b>          | <b>Z</b>          | <b>Occupancy</b> | <b>U<sub>iso</sub></b> |
| <b>Fe1</b>        | <b>8f</b>   | <b>0.00000</b> | <b>0.1378(10)</b> | <b>0.5684(14)</b> | <b>0.6</b>       | <b>0.006(4)</b>        |
| <b>Ti1</b>        | <b>8f</b>   | <b>0.00000</b> | <b>0.1378</b>     | <b>0.5684</b>     | <b>0.4</b>       | <b>0.006</b>           |
| <b>Fe2</b>        | <b>4c</b>   | <b>0.00000</b> | <b>0.1823(11)</b> | <b>0.25000</b>    | <b>0.8</b>       | <b>0.004(7)</b>        |
| <b>Ti2</b>        | <b>4c</b>   | <b>0.00000</b> | <b>0.1823</b>     | <b>0.25000</b>    | <b>0.2</b>       | <b>0.004</b>           |
| <b>O1</b>         | <b>4c</b>   | <b>0.00000</b> | <b>0.762(3)</b>   | <b>0.25000</b>    | <b>1.000</b>     | <b>0.007(17)</b>       |
| <b>O2</b>         | <b>8f</b>   | <b>0.00000</b> | <b>0.035(4)</b>   | <b>0.098(5)</b>   | <b>1.000</b>     | <b>0.055(12)</b>       |
| <b>O3</b>         | <b>8f</b>   | <b>0.00000</b> | <b>0.3042(29)</b> | <b>0.0771(32)</b> | <b>1.000</b>     | <b>0.027(16)</b>       |
| <b>600 °C_3 h</b> |             |                |                   |                   |                  |                        |

| <b>Atom</b> | <b>site</b> | <b><i>x</i></b> | <b><i>Y</i></b>   | <b><i>Z</i></b>   | <b>Occupancy</b> | <b>U<sub>iso</sub></b> |
|-------------|-------------|-----------------|-------------------|-------------------|------------------|------------------------|
| <b>Fe1</b>  | <b>8f</b>   | <b>0.00000</b>  | <b>0.1387(13)</b> | <b>0.5717(15)</b> | <b>0.6</b>       | <b>0.007(4)</b>        |
| <b>Ti1</b>  | <b>8f</b>   | <b>0.00000</b>  | <b>0.1387</b>     | <b>0.5717</b>     | <b>0.4</b>       | <b>0.007</b>           |
| <b>Fe2</b>  | <b>4c</b>   | <b>0.00000</b>  | <b>0.1794(15)</b> | <b>0.25000</b>    | <b>0.8</b>       | <b>0.011(8)</b>        |
| <b>Ti2</b>  | <b>4c</b>   | <b>0.00000</b>  | <b>0.1794</b>     | <b>0.25000</b>    | <b>0.2</b>       | <b>0.011</b>           |
| <b>O1</b>   | <b>4c</b>   | <b>0.00000</b>  | <b>0.761(6)</b>   | <b>0.25000</b>    | <b>1.000</b>     | <b>0.057(12)</b>       |
| <b>O2</b>   | <b>8f</b>   | <b>0.00000</b>  | <b>0.032(4)</b>   | <b>0.094(4)</b>   | <b>1.000</b>     | <b>0.058(14)</b>       |
| <b>O3</b>   | <b>8f</b>   | <b>0.00000</b>  | <b>0.310(3)</b>   | <b>0.067(3)</b>   | <b>1.000</b>     | <b>0.017(11)</b>       |

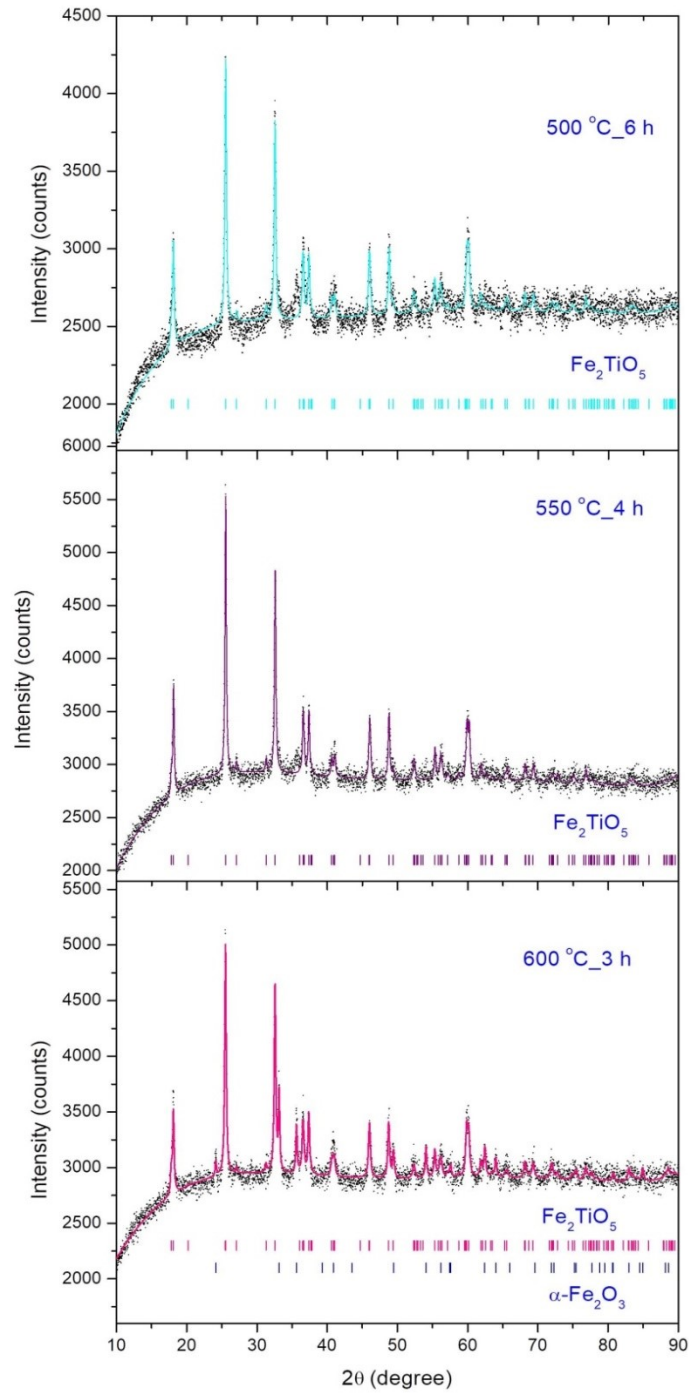

**Fig. S1** Rietveld refinement to XRD patterns of  $\text{Fe}_2\text{TiO}_5$  fibers calcined at 500\_ 6 h, 550\_ 4 h and 600 °C\_ 3 h

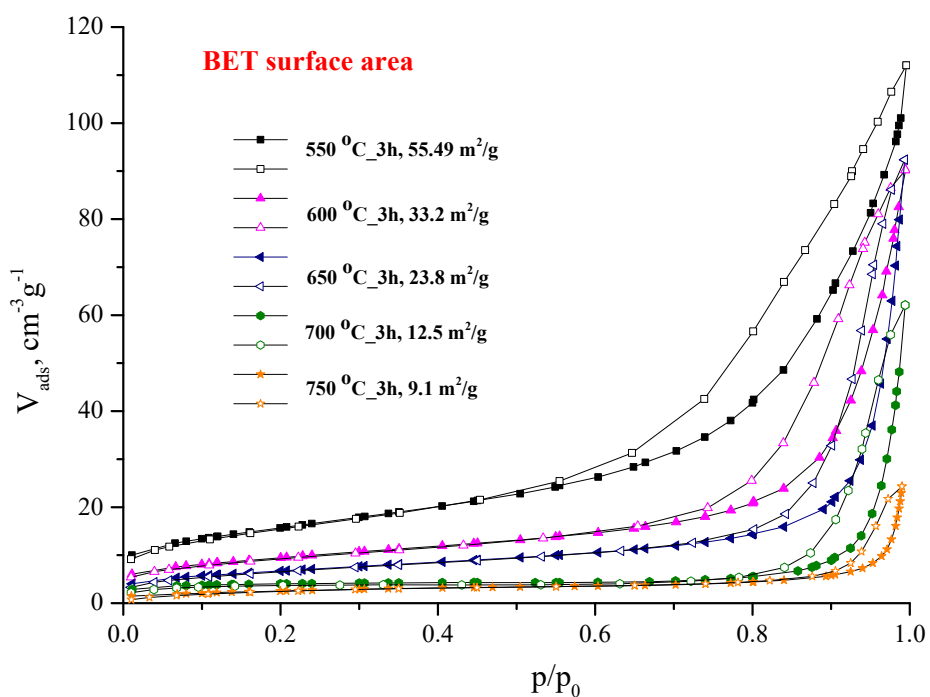

**Fig. S2** N<sub>2</sub> adsorption–desorption isotherms for samples 550 °C\_3 h, 600 °C\_3 h, 650 °C\_3 h, 700 °C\_3 h and 750 °C\_3 h

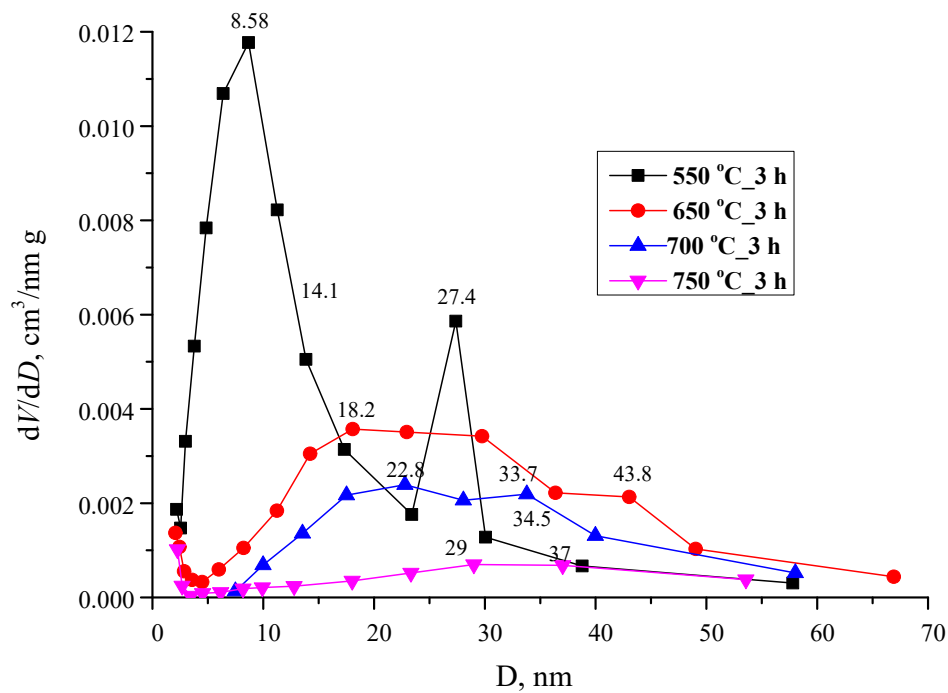

**Fig S3** Pore size distribution curves of samples calcined at 550 °C\_3 h, 650 °C\_3 h, 700 °C\_3 h and 750 °C\_3 h

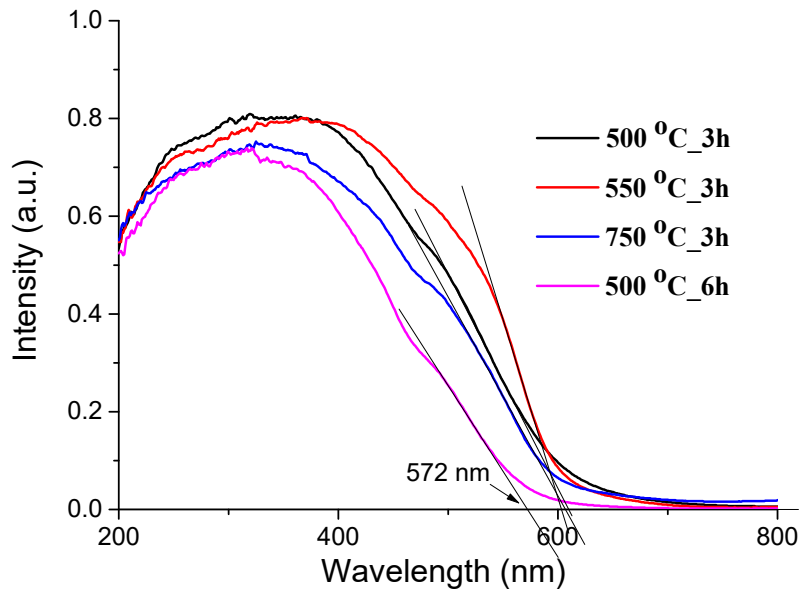

**Fig. S4** Optical absorbance spectra of different PSB calcined nanofibers

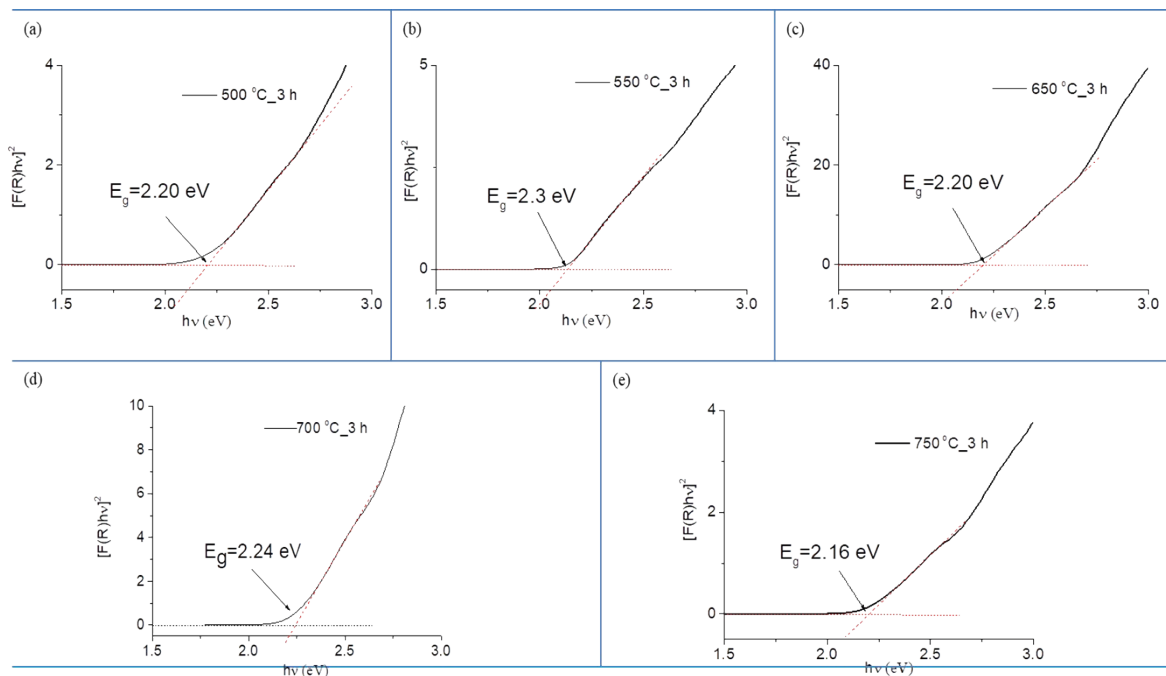

**Fig.S5 a-e** Plots of  $[F(R)hv]^2$  versus photon energy ( $h\nu$ ) for samples 500 °C\_3 h, 550 °C\_3 h, 650 °C\_3 h, 700 °C\_3 h, and 750 °C\_3 h
