# Supplementary figures and images for: Exploring the impact of calcination parameters on the crystal structure, morphology, and optical properties of electrospun Fe2TiO5 nanofibers
Source: Royal Society of Chemistry journal article supplement (doi:10.1039/d1ra05748k), 2021-01-01

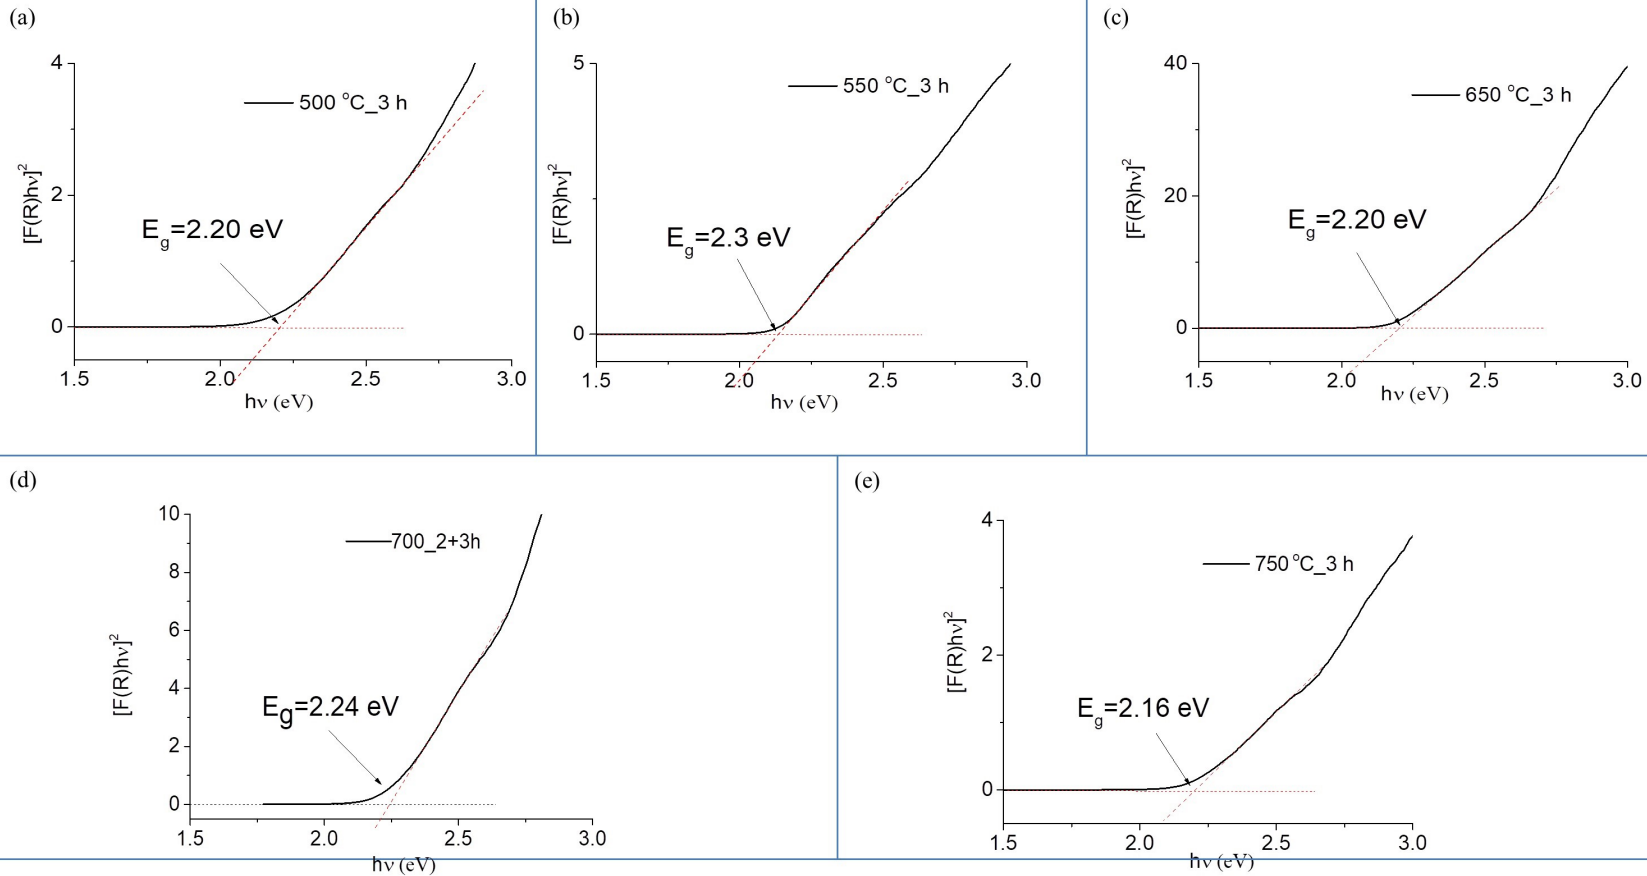

Supplement: d1ra05748k6.pdf [file d1ra05748k6.pdf]
